# Supplementary material for: High acoustic diversity and behavioral complexity of katydids in the Mesozoic soundscape
Source: PubMed Central journal article supplement — Proc Natl Acad Sci U S A. 2022 Dec 15;119(51):e2210601119. doi: 10.1073/pnas.2210601119 (PMC9907137; doi:10.1073/pnas.2210601119), 2022-12-15
Supplement: pnas.2210601119.sapp.pdf [file pnas.2210601119.sapp.pdf]

## **Supplementary Information for High acoustic diversity and behavioral complexity of katydids in the Mesozoic soundscape**

Chunpeng Xu, Bo Wang\*, Torsten Wappler, Jun Chen, Dmitry Kopylov, Yan Fang, Edmund A. Jarzembowski, Haichun Zhang, Michael S. Engel

\* Bo Wang

**Email:** bowang@nigpas.ac.cn

### **This PDF file includes:**

Figures S1 to S10

Tables S1 to S2

Legends for Datasets S1 to S4

SI References

### **Other supplementary materials for this manuscript include the following:**

Datasets S1 to S4

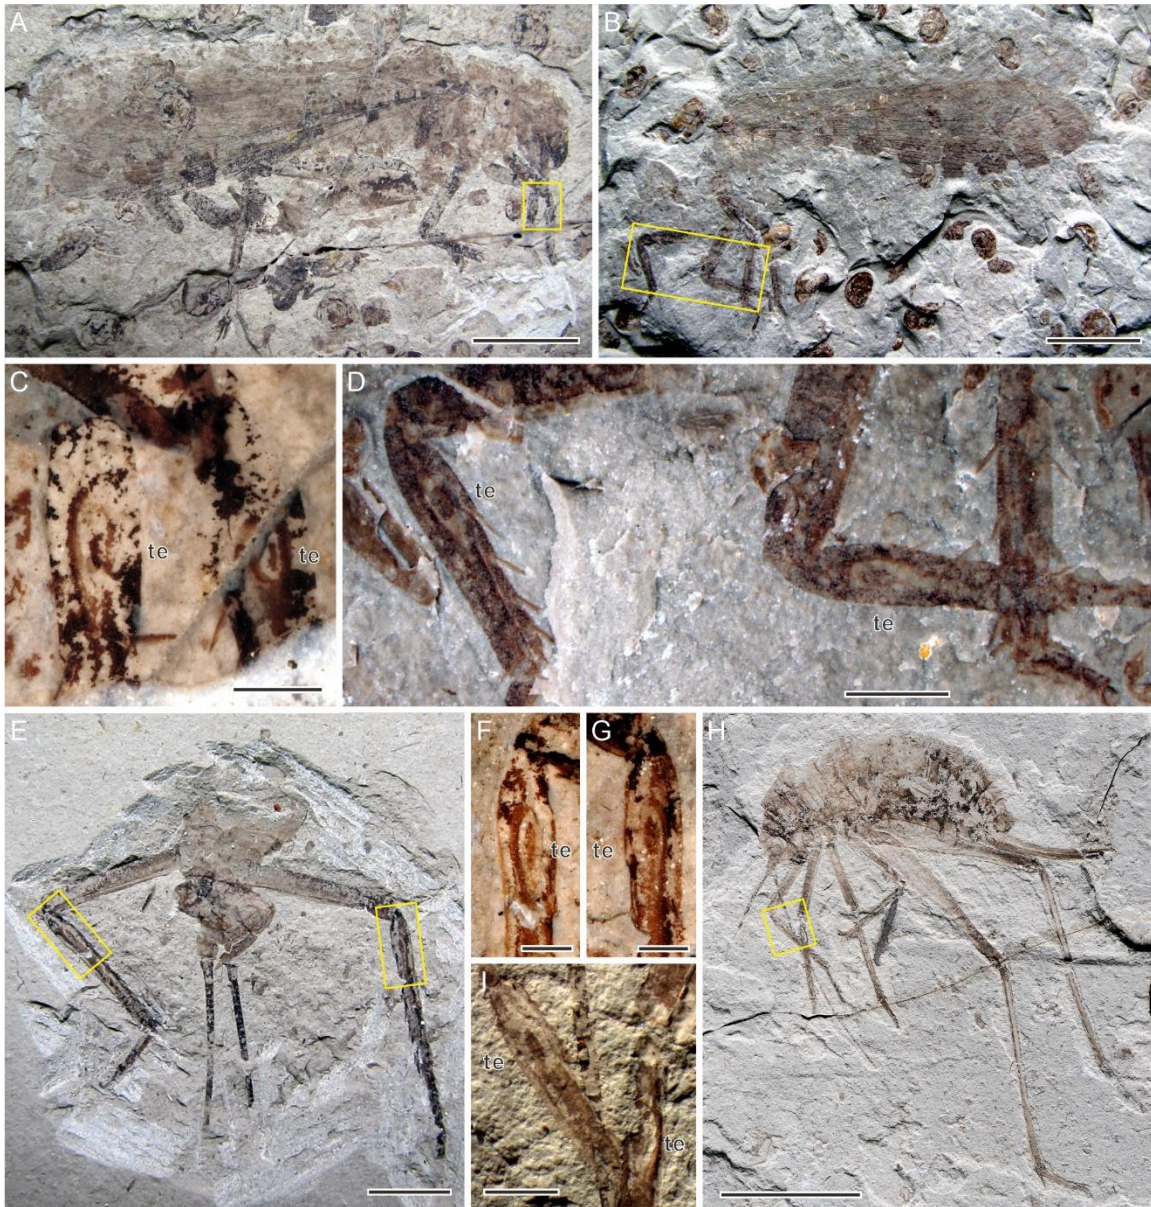

**Fig. S1.** Tympanal ears on Prothalangopsidae from the Middle Jurassic Daohugou Konservat-Lagerstätte. (A) *Sigmaboilus sinensis*, NND04334, female, with tympanal ears (C). (B) *Sigmaboilus sinensis*, NND12z088, female, with tympanal ears (D). (E) unknown taxon, NND08z049, with tympanal ears (F and G). (H) *Sigmaboilus* sp., STMN48-1599, female, with tympanal ears (I). te, tympanal ear. Scale bars, 10 mm (A, B, E, and H), 2 mm (D, I), and 1 mm (C, F, and G).

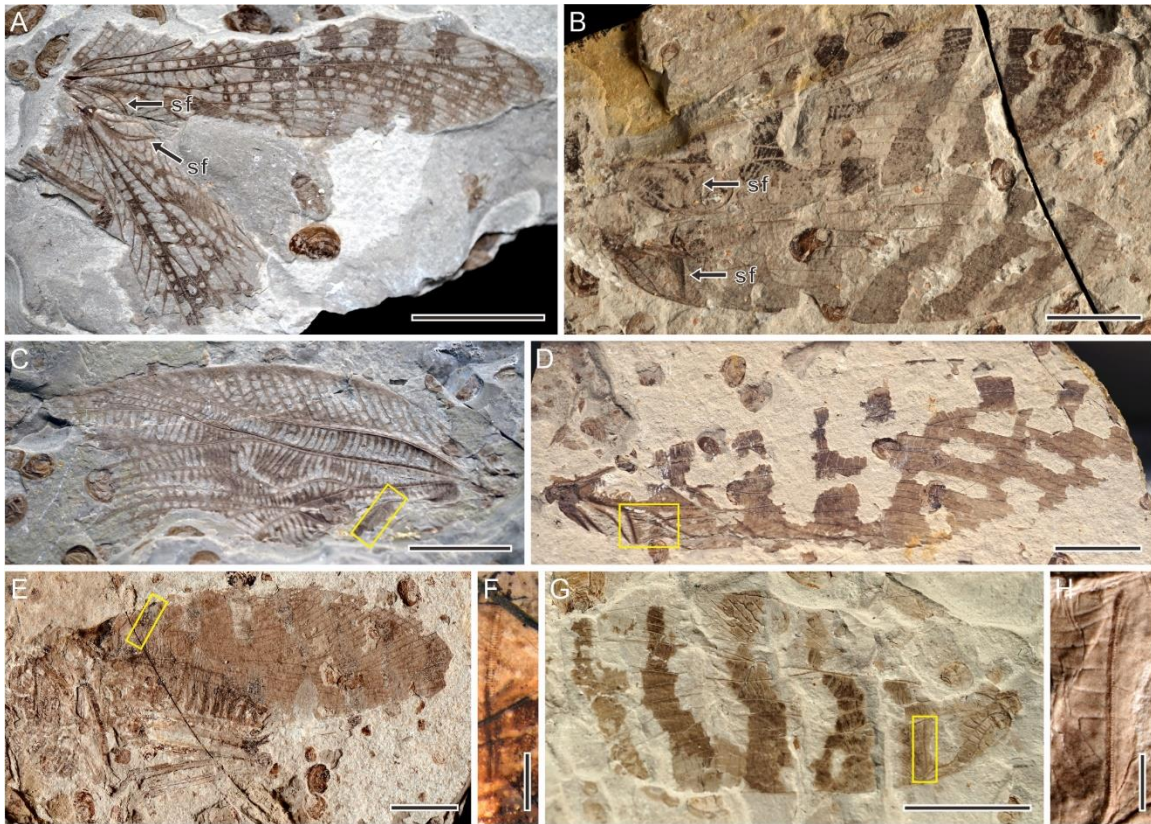

**Fig. S2.** Stridulatory files on Prophalangopsidae and Haglidae from the Middle Jurassic Daohugou Konservat-Lagerstätte. (A) *Sigmaboilus sinensis*, NND12z001, a pair of male forewings. (B) *Sunoprohalangopsis* sp., NND04340, a pair of male forewings. (C) *Liassophyllum caii*, NND12z186, male forewing, stridulatory file. (D) *Allaboilus gigantus*, NND12z171, male forewing, stridulatory file and harp. (E) *Allaboilus* sp., STMN48-1074, male forewing, stridulatory file (F). (G) *Sunoprohalangopsis* sp., NND12z025, male forewing, stridulatory file (H). sf, stridulatory file. Scale bars, 10 mm (A–E, and G), and 1 mm (F and H).

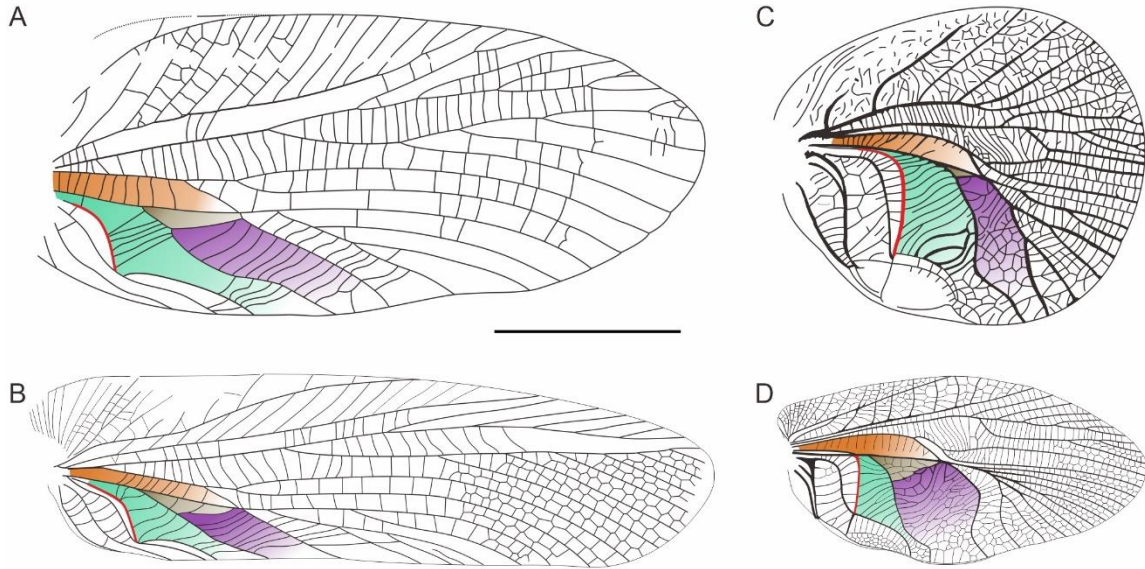

**Fig. S3.** Comparisons of forewings of fossil and extant Prophalangopsidae. (A) *Aboilus chinensis* (Prophalangopsidae; China; Middle Jurassic). (B) *Sigmaboilus sinensis* (Prophalangopsidae; China; Middle Jurassic). (C) *Tarragoilus diuturnus* (Prophalangopsidae; extant). (D) *Prophalangopsis obscura* (Prophalangopsidae; extant). Stridulatory file, red; harp, green; neck, orange; pre-mirror, grey; mirror, purple. Scale bar 10 mm. All to scale.

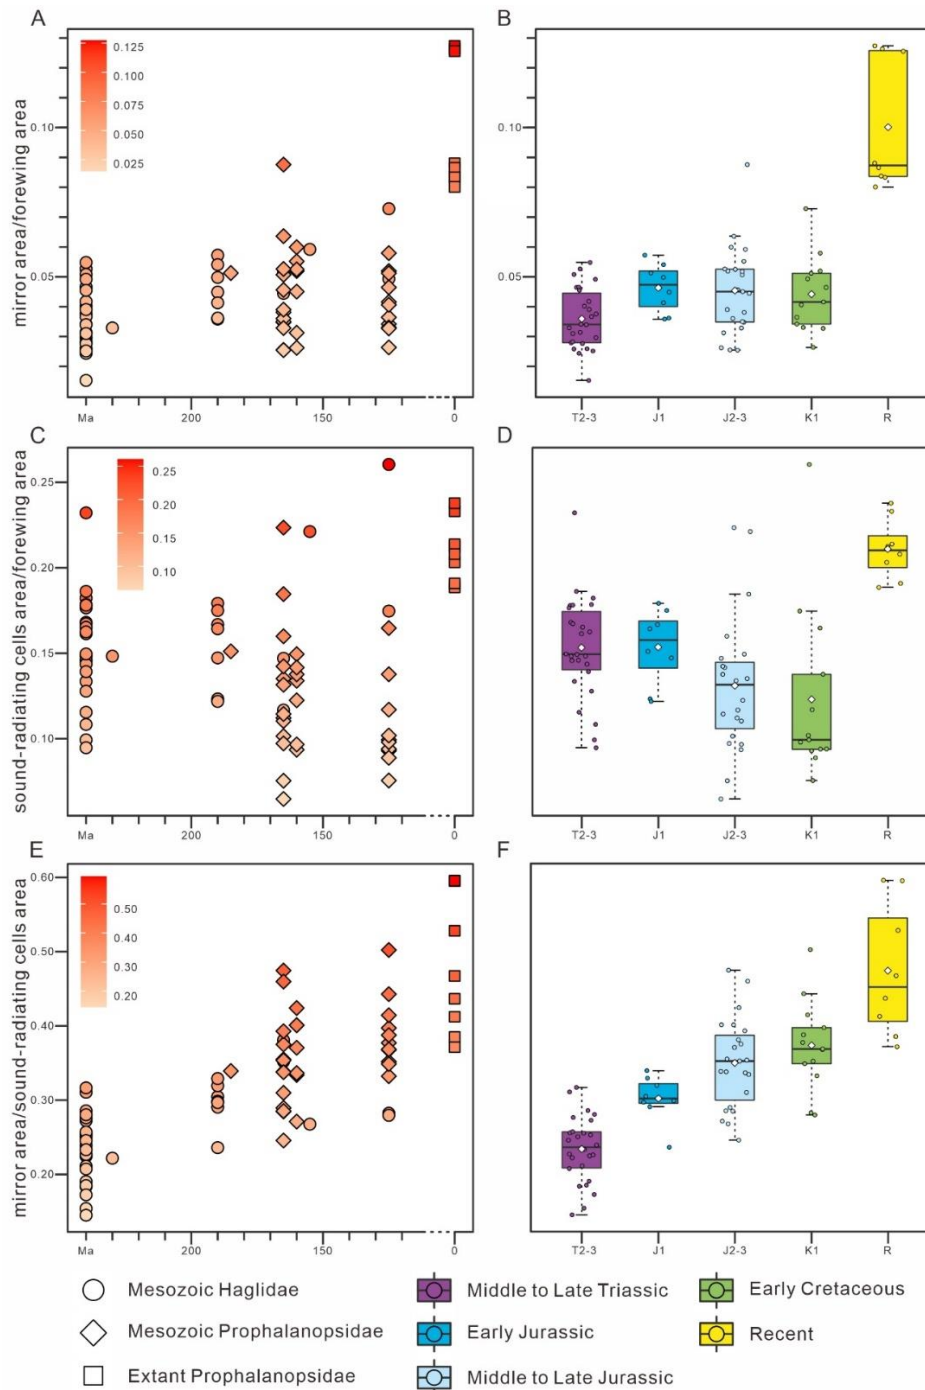

**Fig. S4.** Sound-radiating cells through time. (A–B) Mirror area/forewing area are shown plotted against time. (C–D) Radiating cells area/forewing area are shown plotted against time. (E–F) Mirror area/radiating cell area are shown plotted against time. Points are colored by the values of morphological traits. Abbreviations: T2–3, Middle and Late Triassic; J1, Early Jurassic; J2–3, Middle and Late Jurassic; K1, Early Cretaceous; R, Recent.

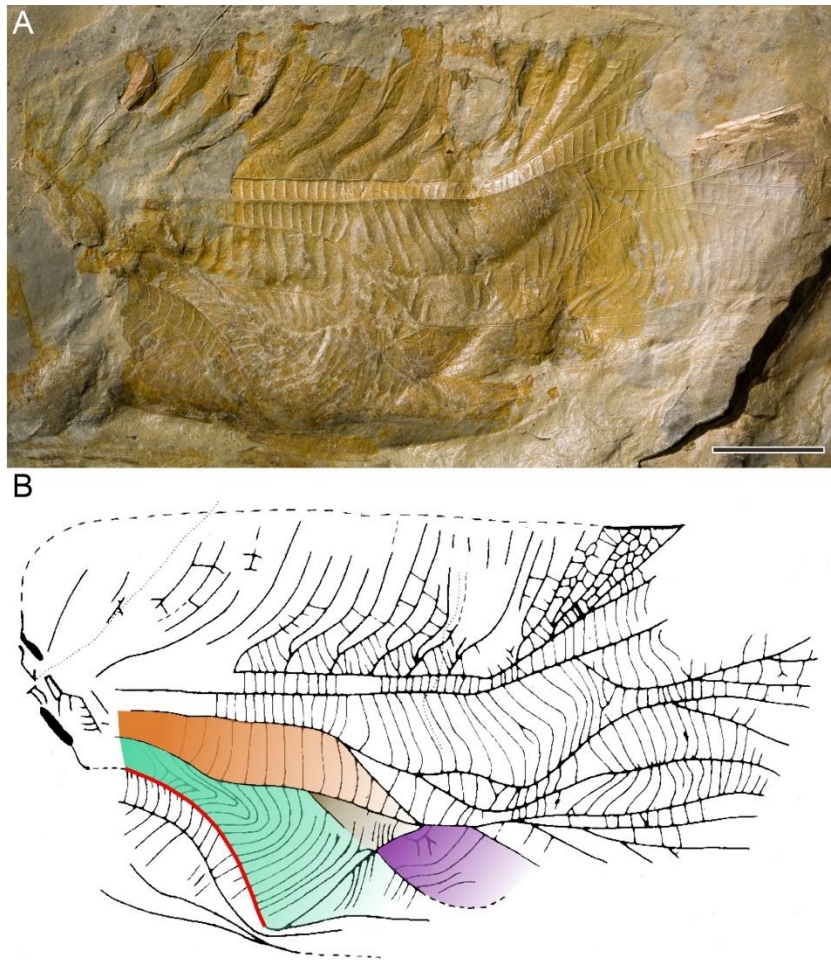

**Fig. S5.** *Afrohagla contorta* from the Late Triassic Molteno Formation of South Africa. Photograph (A) and line drawing (B) of the holotype, BP/2/20996, forewing. Putative stridulatory file, red; harp, green; neck, orange; pre-mirror, grey; mirror, purple. Scale bar 5 mm.

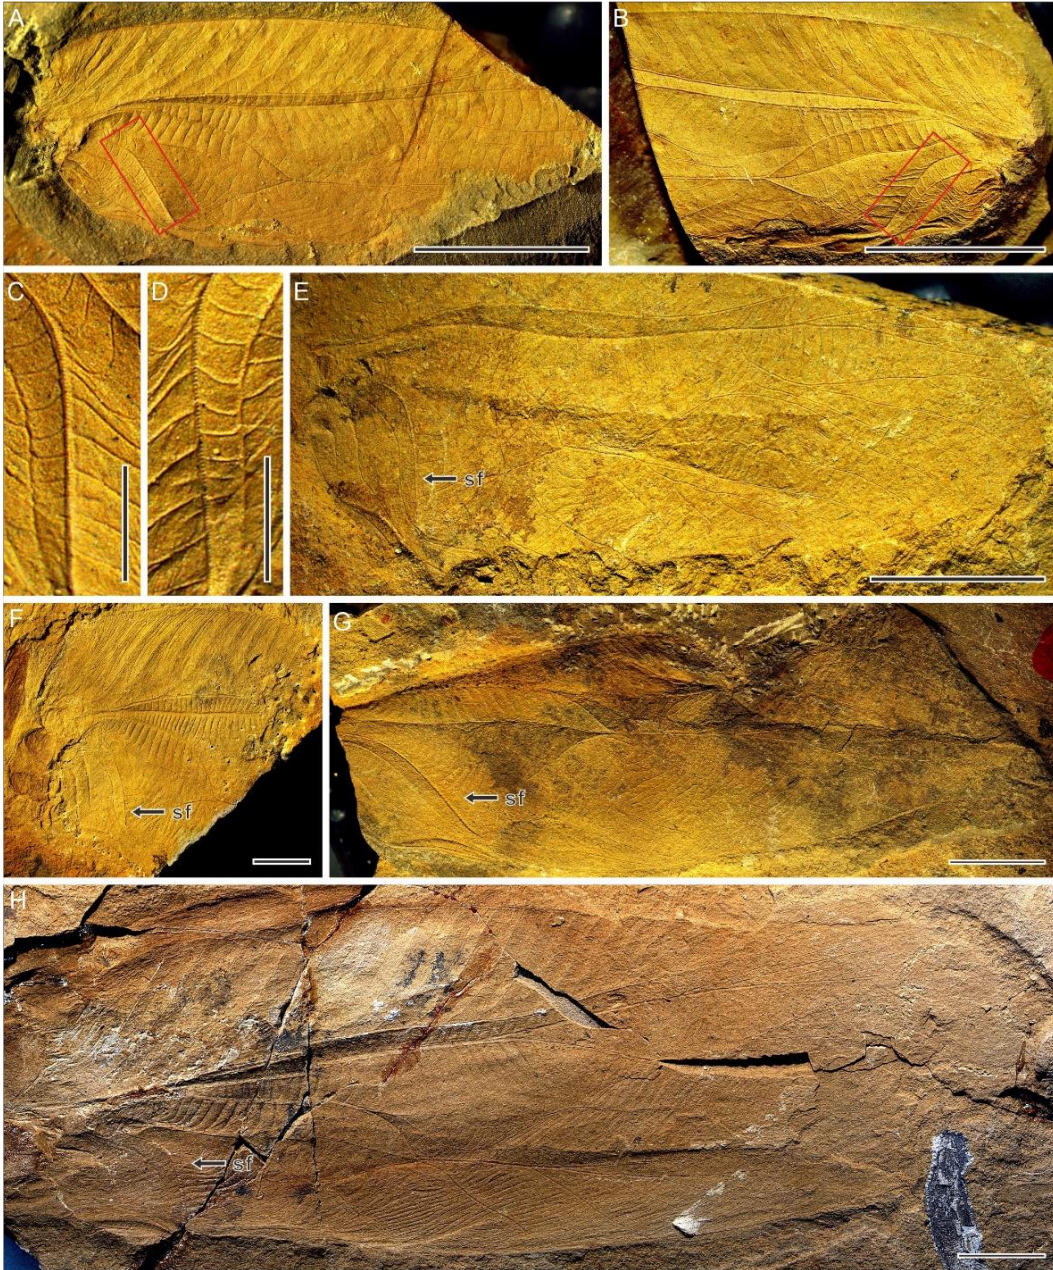

**Fig. S6.** Haglidae from the Middle/Late Triassic Madygen Formation of Kyrgyzstan. (A–B) *Euhagla saurensis*, PIN 2496/32, part and counterpart of male forewing, stridulatory file (C–D). (E) *Dulcihagla mistshenkoi*, PIN 2785/1961, male forewing. (F) *Macrovoliopus declivis*, PIN 2785/1856, male forewing, stridulatory file. (G) *Voliopellus latus*, PIN 2785/1861, male forewing, stridulatory file and harp. (H) *Zeunerophlebia gigas*, PIN 2240/4065, male forewing. sf, stridulatory file. Scale bars, 5 mm (A, B, E and F), 1 mm (C and D), and 10 mm (G and H).

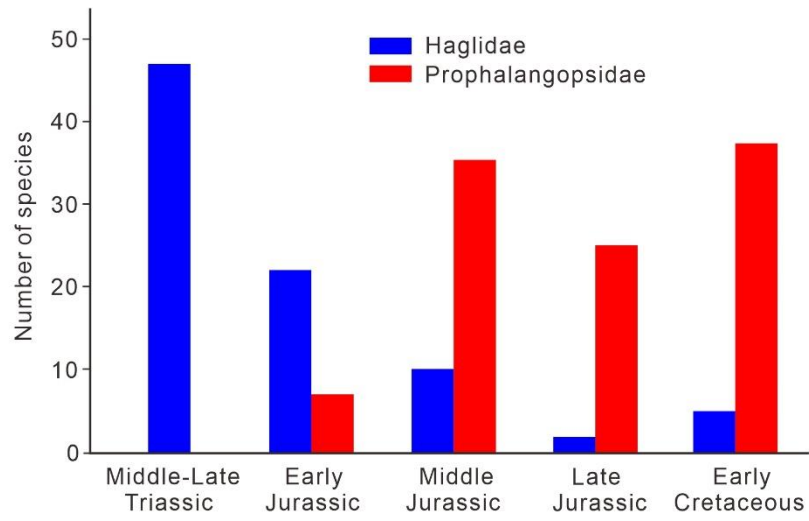

**Fig. S7.** The diversity of Mesozoic Haglidae and Prophalangopsidae.



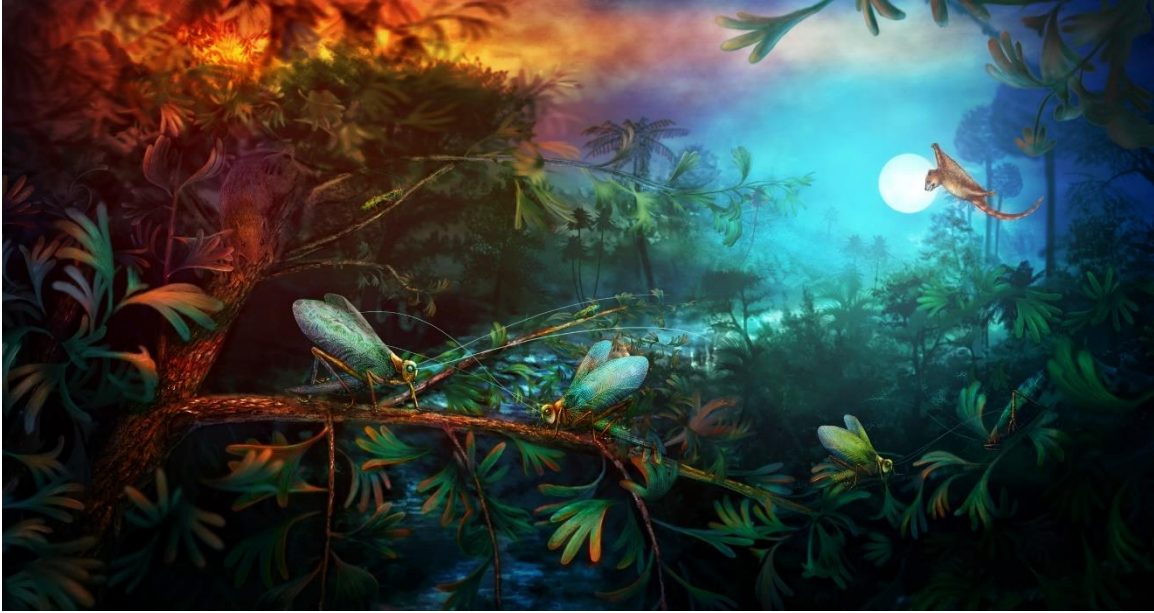

**Fig. S8.** Ecological restoration of singing katydids from the Middle Jurassic Daohugou Konservat-Lagerstätte of China.

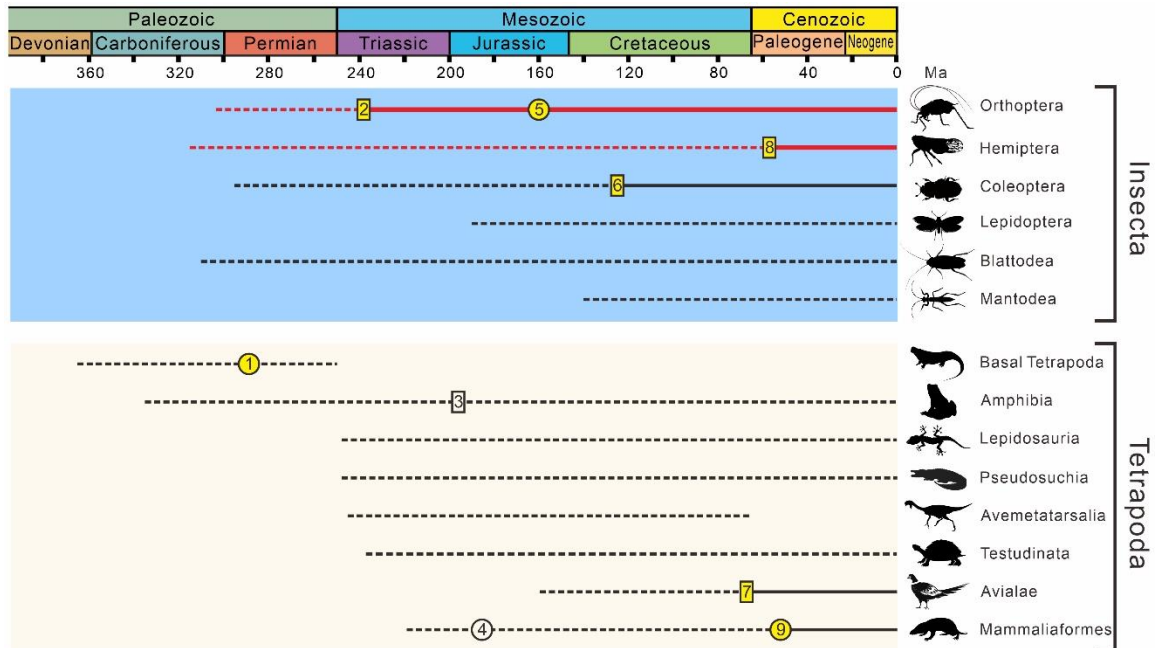

**Fig. S9.** Geological range of acoustic behavior in Insecta (airborne acoustic communication) and Tetrapoda in terrestrial paleoecosystems. Dashed lines indicate the earliest known stem groups; solid lines indicate the concluded origination of acoustic behavior; yellow quadrates and spots indicate the earliest known record of acoustic organs (sound-producing and sound-receiving organs) respectively; transparent quadrates and spots indicate the concluded origination of acoustic organs or behavior, respectively. 1, the earliest tetrapod tympanic membrane of the ear comes from the Early Permian (approximately 290–272 Ma; 296–268 Ma) (1, 2). 2, the earliest known orthopteran stridulatory apparatus comes from the Middle Triassic (approximately 242–237 Ma) (3). 3, the earliest known crown anuran comes from the Early Jurassic (approximately 199–183 Ma) (4), probably indicating the origin of vocal sacs. 4, the earliest high frequency hearing ability of mammals probably originated in the Early Jurassic. 5, the earliest orthopteran tympanum comes from the Middle Jurassic (approximately 160 Ma). 6, the earliest stridulatory structure of Coleoptera comes from the Early Cretaceous (approximately 125 Ma) (5). 7, the earliest bird vocal organ syrinx comes from the latest Cretaceous (approximately 68–66 Ma) (6). 8, the earliest definite cicada comes from the Paleocene (approximately 59–56 Ma when tymbals with sacs probably originated) (7, 8). 9, the earliest known echolocation of bats originates from the early Eocene (approximately 52 Ma) (9, 10).

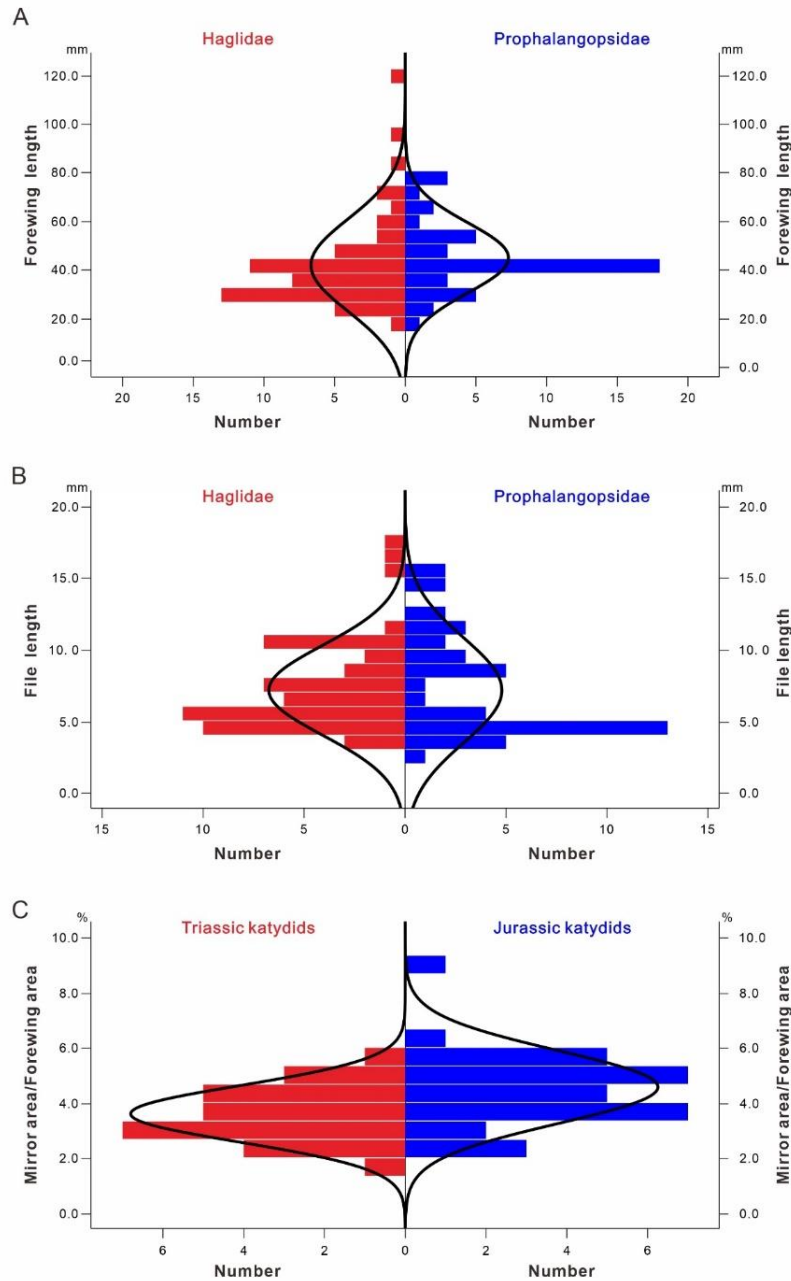

**Fig. S10.** Distributions of the data used for nonparametric tests. (A) Forewing length distribution of Mesozoic Haglidae (53 species) and Prophalangopsidae (44 species). (B) File length distribution of Mesozoic Haglidae (53 species) and Prophalangopsidae (44 species). (C) Distribution of mirror area/forewing area ratio of Triassic (26 species) and Jurassic (31 species) katydids. Numbers on the X-axis indicate the species number of participants; red histograms indicate Mesozoic Haglidae in (A–B) and Triassic katydids in (C); blue histograms indicate Mesozoic Prophalangopsidae in (A–B) and Jurassic katydids in (C); dark lines indicate the normal curve.

**Table S1.** Tympana measurements of Daohugou Prophalangopsidae.

| Species                             | Gender  | Number       | length | width |
|-------------------------------------|---------|--------------|--------|-------|
| <i>Sigmaboilus sinensis</i>         | Male    | NND04329*    | 1.5    | 0.7   |
| <i>Sigmaboilus sinensis</i>         | Male    | NND04345     | 1.3    | 0.5   |
| <i>Sunoprohalangopsis elegantis</i> | Male    | NND04500     | 1.4    | 0.7   |
| <i>Sunoprohalangopsis elegantis</i> | Male    | NND12Z041    | 1.5    | 0.5   |
| <i>Ashangopsis daohugouensis</i>    | Female  | NIGP143691   | 2.1    | 0.5   |
| <i>Sigmaboilus sinensis</i>         | Female  | NND12Z088*   | 1.5    | 0.5   |
| <i>Sigmaboilus sinensis</i>         | Female  | NND04334*    | 1.5    | 0.6   |
| <i>Sigmaboilus</i> sp.              | Female  | NND12Z069    | 1.5    | 0.5   |
| <i>Sigmaboilus</i> sp.              | Female  | NND04410     | 1.5    | 0.4   |
| <i>Sigmaboilus</i> sp.              | Female  | NND12Z121*   | 1.5    | 0.6   |
| <i>Sigmaboilus</i> sp.              | Female  | STMN48-1068* | 1.3    | 0.5   |
| <i>Sunoprohalangopsis</i> sp.       | Female  | NND12Z075    | 1.7    | 0.8   |
| <i>Sunoprohalangopsis</i> sp.       | Female  | NND08Z056    | 1.4    | 0.6   |
| <i>Sunoprohalangopsis</i> sp.       | Female  | NND12Z128    | 1.4    | 0.4   |
| <i>Sunoprohalangopsis</i> sp.       | Female  | NND12Z009    | 1.3    | 0.5   |
| <i>Sunoprohalangopsis</i> sp.       | Female  | NND12Z061*   | 1.5    | 0.6   |
| <i>Sunoprohalangopsis</i> sp.       | Female  | NND12Z036    | 1.4    | 0.5   |
| <i>Sunoprohalangopsis</i> sp.       | Female  | NND04337     | 1.0    | 0.4   |
| <i>Sunoprohalangopsis</i> sp.       | Female  | NND04509     | 1.7    | 0.5   |
| <i>Sunoprohalangopsis</i> sp.       | Female  | STMN48-1599* | 1.6    | 0.7   |
| <i>Sunoprohalangopsis</i> sp.       | Female  | NND04328     | 2.1    | 0.5   |
| <i>Sunoprohalangopsis</i> sp.       | Female  | NND04501     | 1.1    | 0.5   |
| <i>Sunoprohalangopsis</i> sp.       | Female  | NND12Z011    | 1.7    | 0.6   |
| unknown                             | unknown | NND08Z049*   | 2.1    | 0.8   |

All measurements are in mm.

“\*\*” represents fossils with two identical tympanal ears on left and right legs.

**Table S2.** Forewing measurements of selected specimens from Daohugou.

| Species                        | Number      | Forewing length | Forewing width | File length |
|--------------------------------|-------------|-----------------|----------------|-------------|
| <i>Sigmaboilus sinensis</i>    | NND12Z001   | 37.0            | 9.7            | 4.4         |
| <i>Sigmaboilus</i> sp.         | NND12Z033   | 39.3            | 9.1            | 4.3         |
| <i>Sunoprothalangopsis</i> sp. | NND04340    | 53.4            | 16.5           | 4.8         |
| <i>Sunoprothalangopsis</i> sp. | NND12Z025   | ~52             | 16.4           | 4.4         |
| <i>Sunoprothalangopsis</i> sp. | NND04390    | ~54             | 16.5           | 4.5         |
| <i>Sunoprothalangopsis</i> sp. | STMN48-1447 | 51.4            | 15.7           | 4.5         |
| <i>Sunoprothalangopsis</i> sp. | STMN48-1637 | 55.8            | 18.8           | 5.2         |
| <i>Allaboilus gigantus</i>     | NND12Z014   | 83.8            | 34.6           | 13.0        |
| <i>Allaboilus gigantus</i>     | NND12Z172   | 73.5            | 25.3           | 9.8         |
| <i>Allaboilus</i> sp.          | NND12z171   | 65.9            | 19.5           | ~7          |
| <i>Allaboilus</i> sp.          | NND12Z080   | 58.8            | 20.9           | 9.6         |
| <i>Allaboilus</i> sp.          | STMN48-1074 | 57.4            | ~21            | ~10         |
| <i>Allaboilus</i> sp.          | NND12Z157   | ~62             | ~22            | 11.0        |
| <i>Liassophyllum caii</i>      | NND12Z186   | ~50             | ~20            | ~10         |
| <i>Liassophyllum caii</i>      | NND04397    | 52.7            | 22.9           | ~10         |
| <i>Liassophyllum caii</i>      | NND04322    | 53.1            | 22.1           | 10.3        |

All measurements are in mm.

“~” represents the estimated length and width.

**Dataset S1 (separate file).** Measurements of Mesozoic katydids and Recent Prophalangopsidae with sound-radiating cells.

**Dataset S2 (separate file).** Diversity database of Mesozoic Haglidae and Prophalangopsidae.

**Dataset S3 (separate file).** Measurements of Mesozoic Haglidae with stridulatory files.

**Dataset S4 (separate file).** Measurements of Mesozoic Prophalangopsidae with stridulatory files.

## SI References

1. P. P. Vaughn, *Seymouria* from the Lower Permian of southeastern Utah, and possible sexual dimorphism in that genus. *J. Paleontol.* **40**, 603–612 (1966).
2. R. Kissel, *Morphology, Phylogeny, and Evolution of Diadectidae (Cotylosauria: Diadectomorpha)* (University of Toronto, 2010).
3. A. G. Sharov, Phylogeny of the Orthopteroidea. *Trudy Paleontol. Inst. Akad. Nauk SSSR* **118**, 1–216 (1968).
4. N. H. Shubin, F. A. Jenkins, An Early Jurassic jumping frog. *Nature* **377**, 49–52 (1995).
5. B. Wang *et al.*, The earliest known longhorn beetle (Cerambycidae: Prioninae) and implications for the early evolution of Chrysomeloidea. *J. Syst. Palaeontol.* **12**, 565–574 (2014).
6. E. P. Kingsley, Identity and novelty in the avian syrinx. *Proc. Natl. Acad. Sci. U.S.A.* **115**, 10109–10217 (2018).
7. K. W. Cooper, *Davispsia bearcreekensis* Cooper, a new cicada from the Paleocene, with a brief review of the fossil Cicadidae. *Am. J. Sci.* **239**, 286–304 (1941).
8. B. Wang, “Mesozoic Hemiptera and Coleoptera (Insecta) from Northeastern China: Taxonomy, Evolution, and Taphonomy”, Nanjing Institute of Geology and Palaeontology, Chinese Academy of Sciences, Nanjing. (2009).
9. M. S. Springer *et al.*, Integrated fossil and molecular data reconstruct bat echolocation. *Proc. Natl. Acad. Sci. U.S.A.* **98**, 6241–6246 (2001).
10. G. F. Gunnell, N. B. Simmons, Fossil evidence and the origin of bats. *J. Mamm. Evol.* **12**, 209–246 (2005).
